# Supplementary material
Source: publisher site journal article supplement (https://www.dovepress.com/article/306857)
Supplement: Supplementary file 1 [file get_supplementary_file.php]

**Supplemental Table 1.** Characteristics from the registration form including 5-year data from the Danish Myelodysplastic Syndromes Database. Data are shown for the whole population, the validation sample and the misclassified MDS patients.

|                                        | <b>Total MDS population</b> | <b>Validation sample</b> | <b>Misclassified MDS patients</b> |
|----------------------------------------|-----------------------------|--------------------------|-----------------------------------|
| Numbers                                | 449 (20%)                   | 47 (20%)                 | 8 (36%)                           |
| <b>Treatment</b>                       |                             |                          |                                   |
| Transfusion                            | 9 (2%)                      | -                        | 0                                 |
| Erythropoiesis-stimulating agents      | 147 (33%)                   | 21 (45%)                 | 0                                 |
| Granulocyte-colony-stimulating-factors | 63 (14%)                    | 6 (13%)                  | 0                                 |
| Hypomethylating agents (Azacitidine)   | 39 (9%)                     | 4 (8.5%)                 | 0                                 |
| Iron-chelating agents                  | 33 (7%)                     | 6 (13%)                  | -                                 |
| Hydroxyurea                            | 22 (5%)                     | -                        | -                                 |
| AML-like chemotherapy                  | 18 (4%)                     | -                        | 0                                 |
| Immune suppressive agents              | 37 (8%)                     | 4 (8.5%)                 | 0                                 |
| Lenalidomide                           | -                           | 0                        | 0                                 |
| Protocol participation                 | 18 (4%)                     | -                        | 0                                 |
| <i>Missing</i>                         | 0                           | 0                        | 0                                 |
| <i>Unknown</i>                         | 19 (4%)                     | -                        | 0                                 |
| Progression to sAML                    | 55 (12%)                    | 9 (19%)                  | 0                                 |
| <i>Missing</i>                         | 9 (2%)                      | 0                        | 0                                 |
| <i>Unknown</i>                         | 9 (2%)                      | 0                        | 0                                 |
| Date of progression to sAML            | 47 (10%)                    | 7 (80%)                  | 0                                 |
| <i>Missing</i>                         | 8 (14%)                     | -                        | 0                                 |
| <i>Unknown</i>                         | 0                           | 0                        | 0                                 |
| Allo-HSCT                              | 30 (7%)                     | -                        | 0                                 |
| <i>Missing</i>                         | 0                           | 0                        | 0                                 |
| <i>Unknown</i>                         | 0                           | 0                        | 0                                 |
| Date of Allo-HSCT                      | 30 (100%)                   | -                        | 0                                 |
| <i>Missing</i>                         | 0                           | 0                        | 0                                 |
| <i>Unknown</i>                         | 0                           | 0                        | 0                                 |
| Type of Allo-HSCT                      | 30 (100%)                   | -                        | 0                                 |
| <i>Missing</i>                         | 0                           | 0                        | 0                                 |
| <i>Unknown</i>                         | 0                           | 0                        | 0                                 |

**Abbreviations:** Allo-HSCT, allogeneic hematopoietic stem cell transplantation; sAML, acute myeloid leukemia.

- Data not shown due to small numbers.

**Supplemental Table 2.** Predictive values (%) with 95 % confidence intervals, stratified by departments and year of diagnosis. Data are shown for 18 variables from the registration form completed at diagnosis.

| Variable                                      | Regional Hospitals<br>(n = 47) | University Hospitals<br>(n= 213) | Diagnosed ≤ 2014<br>(n = 133) | Diagnosed > 2014<br>(n = 127) |
|-----------------------------------------------|--------------------------------|----------------------------------|-------------------------------|-------------------------------|
| Diagnosis                                     | 93.6 (81.5-97.9)               | 91.1 (86.4-94.3)                 | 87.7 (81.2-92.5)              | 95.3 (89.8-97.9)              |
| Date of diagnosis ± 14 days                   | 95.5 (83.0-98.9)               | 93.8 (89.4-96.5)                 | 92.3 (85.8-96.0)              | 95.9 (90.4-98.3)              |
| Prior hematological disease > 3 months        |                                |                                  |                               |                               |
| Yes                                           | 100.0 (47.8-100)               | 71.4 (41.9-91.6)                 | 71.4 (29.0-96.3)              | 83.3 (51.6-97.9)              |
| No                                            | 100.0 (89.7-100)               | 97.2 (93.6-99.1)                 | 98.2 (93.5-99.8)              | 97.1 (91.8-99.4)              |
| Overall                                       | 100.0 (90.1-100)               | 95.3 (91.3-97.8)                 | 96.6 (91.4-99.5)              | 95.7 (90.2-98.6)              |
| Prior chemotherapy                            |                                |                                  |                               |                               |
| Yes                                           | 100.0 (39.8-100)               | 88.9 (51.8-99.7)                 | 96.4 (91.0-99.0)              | 90.0 (55.5-99.7)              |
| No                                            | 100.0 (86.8-100)               | 95.1 (90.9-97.8)                 | 100.0 (29.2-100)              | 95.0 (88.8-98.4)              |
| Overall                                       | 100.0 (88.4-100)               | 94.8 (90.7-97.5)                 | 96.5 (91.2-99.0)              | 94.6 (88.6-98.0)              |
| Prior radiotherapy                            |                                |                                  |                               |                               |
| Yes                                           | 100.0 (29.2-100)               | 83.3 (35.9-99.6)                 | 100.0 (39.8-100)              | 80.0 (28.4-99.5)              |
| No                                            | 96.3 (81.3-99.9)               | 98.4 (95.4-99.7)                 | 98.1 (93.5-99.8)              | 98.1 (93.4-99.8)              |
| Overall                                       | 96.3 (82.8-99.9)               | 97.9 (94.8-99.4)                 | 98.2 (93.7-99.8)              | 97.3 (92.3-99.4)              |
| Blood transfusion prior to diagnosis          |                                |                                  |                               |                               |
| Yes                                           | 100.0 (54.1-100)               | 100.0 (63.1-100.0)               | -                             | 100.0 (76.8-100)              |
| No                                            | 88.9 (51.8-99.7)               | 84.2 (74.0-91.6)                 | 100.0 (29.2-100)              | 84.1 (74.1-91.2)              |
| Overall                                       | 93.3 (68.1-99.8)               | 85.7 (76.4-92.4)                 | 100.0 (29.2-100)              | 86.5 (78.0-92.6)              |
| Blast percentage in bone marrow               | 90.7 (77.2-96.57)              | 91.5 (86.6-94.8)                 | 91.2 (84.4-95.2)              | 91.5 (84.9-95.4)              |
| Hemoglobin (<6.2 mmol/L)                      |                                |                                  |                               |                               |
| Yes                                           | 93.3 (77.9-99.2)               | 88.5 (80.7-93.9)                 | 85.0 (73.4-92.9)              | 93.2 (84.9-97.8)              |
| No                                            | 100.0 (75.3-100)               | 94.4 (87.4-98.2)                 | 98.2 (90.3-99.9)              | 91.5 (79.6-97.6)              |
| Overall                                       | 95.3 (84.2-99.4)               | 91.2 (86.3-94.8)                 | 91.3 (84.6-95.8)              | 92.7 (86.3-96.5)              |
| Thrombocytopenia (<100x10 <sup>9</sup> /L)    |                                |                                  |                               |                               |
| Yes                                           | 100.0 (82.4-100)               | 98.4 (91.5-99.9)                 | 100.0 (90.5-100)              | 97.8 (88.2-99.9)              |
| No                                            | 100.0 (85.8-100)               | 96.2 (91.3-98.7)                 | 96.2 (89.2-99.2)              | 97.4 (90.8-99.7)              |
| Overall                                       | 100.0 (91.8-100)               | 96.9 (93.4-98.9)                 | 97.4 (92.6-99.5)              | 97.5 (92.9-99.5)              |
| Neutropenia (<1.8x10 <sup>9</sup> /L)         |                                |                                  |                               |                               |
| Yes                                           | 100.0 (76.8-100)               | 96.3 (89.6-99.2)                 | 96.2 (87.0-99.5)              | 97.6 (87.4-99.9)              |
| No                                            | 85.7 (67.3-96.0)               | 91.1 (84.2-95.6)                 | 90.2 (79.8-96.3)              | 89.9 (81.0-95.5)              |
| Overall                                       | 90.5 (77.4-97.3)               | 93.3 (88.8-96.4)                 | 93.0 (86.6-96.9)              | 92.3 (86.3-96.5)              |
| Middle cell volume (fL)                       | 92.9 (79.5-97.8)               | 91.4 (86.3-94.7)                 | 90.2 (83.0-94.5)              | 93.1 (86.7-96.5)              |
| Hemoglobin ( mmol/L)                          | 95.3 (82.6-98.9)               | 94.8 (90.6-97.2)                 | 95.7 (89.9-98.2)              | 94.2 (88.3-97.2)              |
| Platelet count (1x10 <sup>9</sup> /L)         | 93.0 (79.9-97.8)               | 91.7 (86.9-94.9)                 | 90.4 (83.5-94.7)              | 93.4 (87.3-96.7)              |
| White blood cell count (1x10 <sup>9</sup> /L) | 90.5 (76.7-96.5)               | 94.2 (89.9-96.8)                 | 92.9 (86.4-96.4)              | 96.7 (91.4-98.8)              |
| Leucocyte count (1x10 <sup>9</sup> /L)        | 93.0 (79.9-97.8)               | 94.3 (89.9-96.8)                 | 91.3 (84.5-95.3)              | 96.7 (91.4-98.8)              |
| Monocyte count (1x 10 <sup>9</sup> /L)        | 81.3 (52.3-94.4)               | 97.8 (91.7-99.5)                 | -                             | 95.3 (89.1-98.1)              |
| Lactate dehydrogenase (U/L)                   | 95.1 (81.8-98.8)               | 93.0 (88.2-95.9)                 | 90.9 (83.8-95.1)              | 95.7 (90.0-98.2)              |
| Ferritin µg/L                                 | 92.3 (78.0-97.6)               | 86.5 (80.1-90.9)                 | 85.6 (77.4-91.5)              | 89.2 (81.8-93.8)              |

- Data not shown due to small numbers.

Supplemental figure 1. Predictive values for 15 variables from the registration form including 5-year data from the Danish Myelodysplastic Syndrome Database.

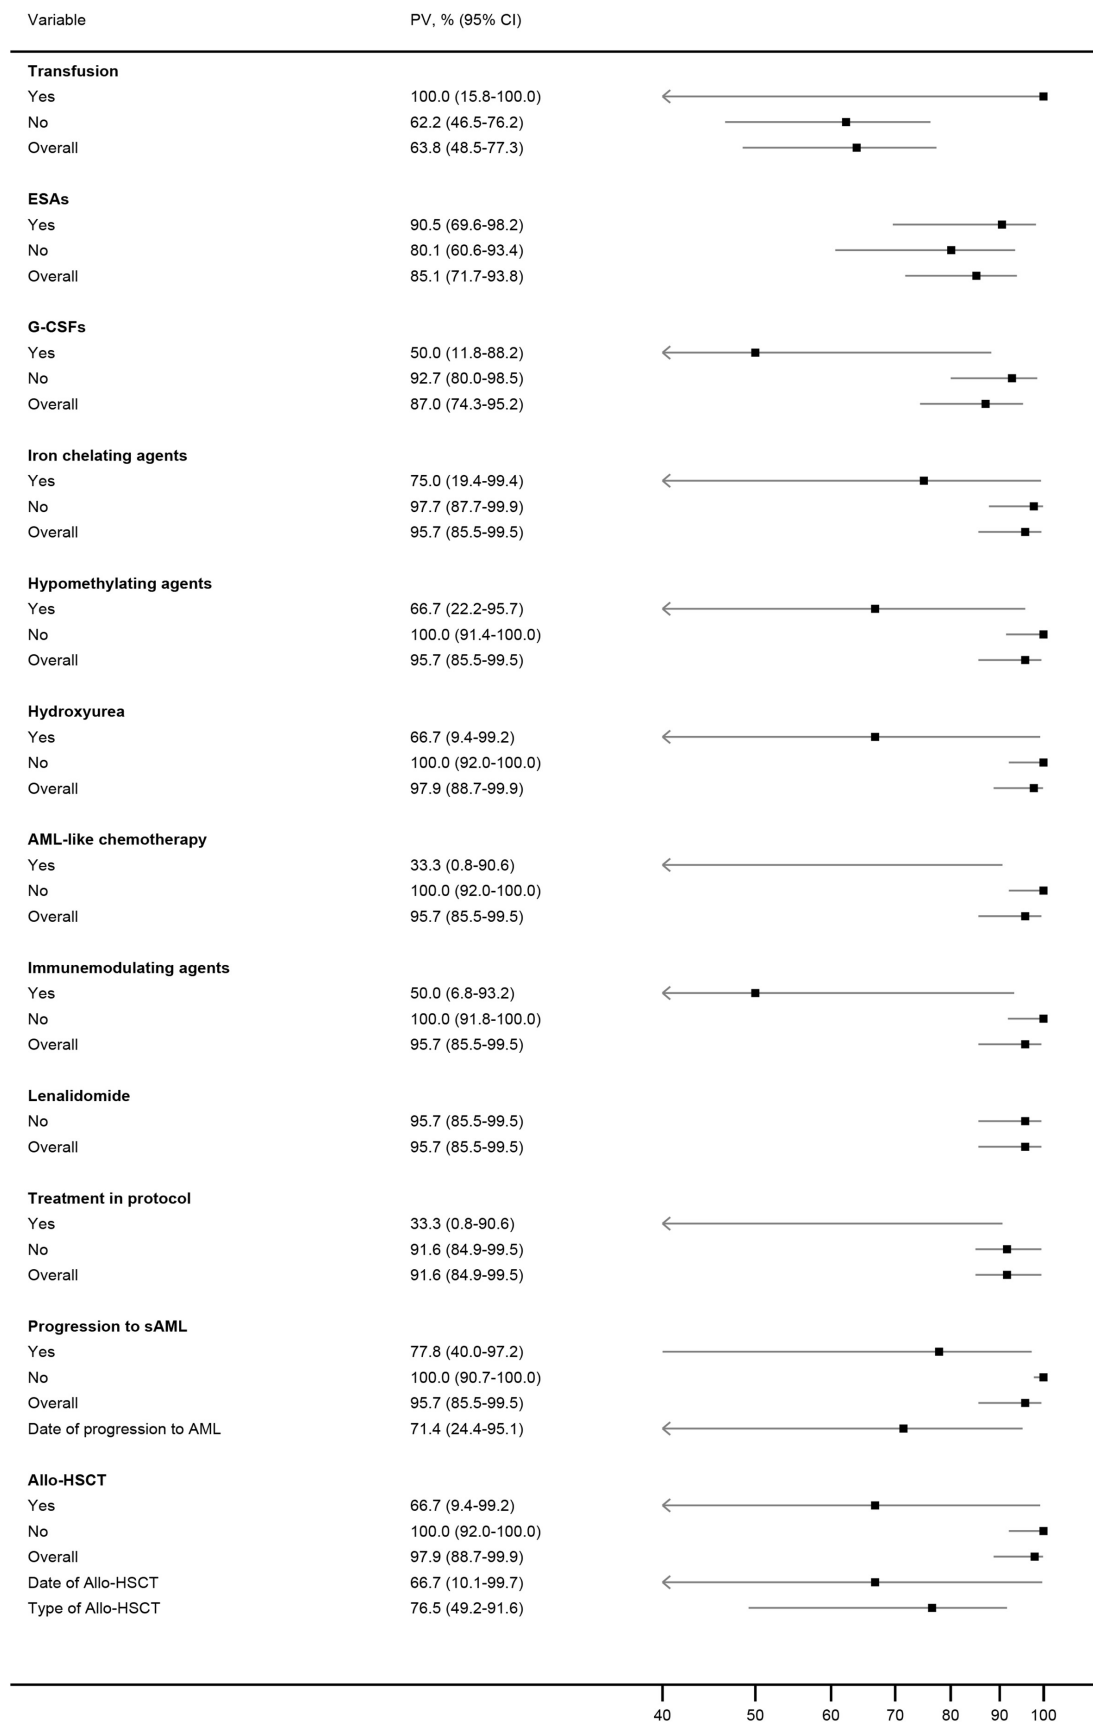

Abbreviations: Allo-HSCT, allogeneic hematopoietic stem cell transplantation; CI, confidence interval, G-CSF, granulocyte-colony-stimulating-factors; sAML, acute myeloid leukemia.

\* Ratio not shown due to small numbers.
